# Supplementary material for: Enhanced Magnetism and Anomalous Hall Transport through Two-Dimensional Tungsten Disulfide Interfaces
Source: MDPI journal article supplement (doi:10.3390/nano13040771), 2023-02-18
Supplement: s1 [file s1]

## Supporting information

### **Enhanced Magnetism and Anomalous Hall Transport through Two-dimensional Tungsten Disulfide Interfaces**

Chang-Ming Hung<sup>1</sup>, Diem Thi-Xuan Dang<sup>1</sup>, Amit Chanda<sup>1</sup>, Derick Detellem<sup>1</sup>, Noha Alzahrani<sup>1</sup>, Nalaka A Kapuruge<sup>1</sup>, Yen T.H. Pham<sup>1</sup>, Mingzu Liu<sup>2</sup>, Da Zhou<sup>2</sup>, Humberto R Gutierrez<sup>1</sup>, Darío A. Arena<sup>1</sup>, Mauricio Terrones<sup>2</sup>, Sarath Witanachchi<sup>1</sup>, Lilia M. Woods<sup>1,\*</sup>, Hariharan Srikanth<sup>1,\*</sup>, and Manh-Huong Phan<sup>1,\*</sup>

<sup>1</sup>Department of Physics, University of South Florida, Tampa, Florida 33620, USA

<sup>2</sup>Department of Physics, The Pennsylvania State University, University Park, PA 16802, USA

\*Corresponding authors: phanm@usf.edu (M.H.P), lmwoods@usf.edu (L.M.W), sharihar@usf.edu (H.S)

### S1. Wet transfer process

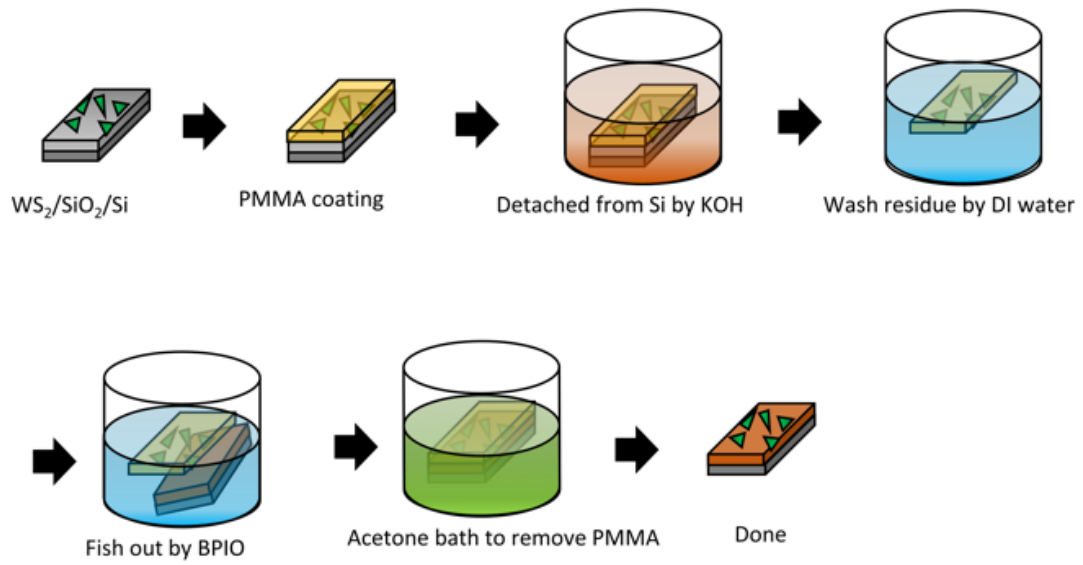

**Figure S1.** Schematic diagram of the wet transfer process.

### S2. Pt/BPIO fitted by electron-electron interaction

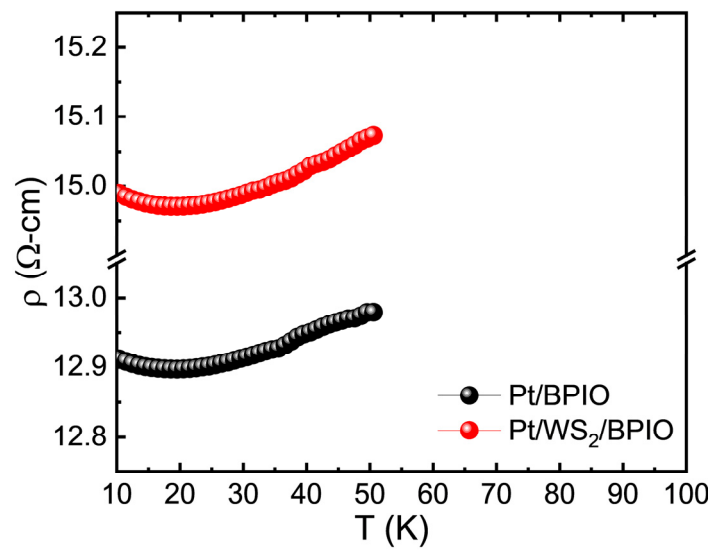

**Figure S2.** Low temperature resistivity behaviors for Pt/BPIO and Pt/WS<sub>2</sub>/BPIO.

S3. Temperature-dependent resistance measurement of pure Pt

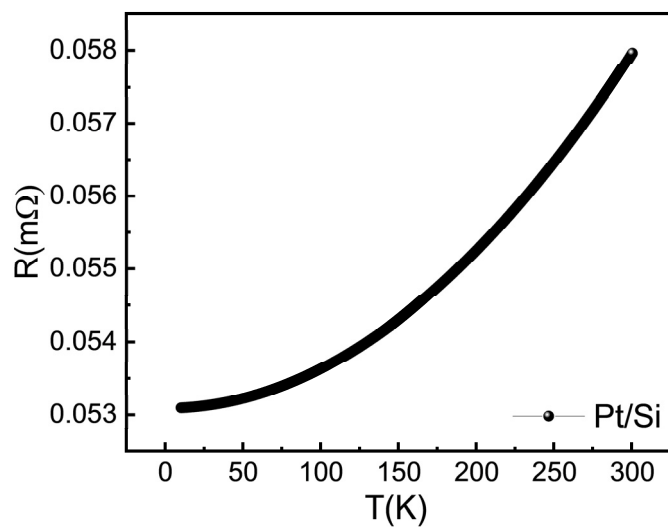

**Figure S3.** Temperature dependence of resistance of pure Pt
